1                   **Single Molecule Mechanics and Kinetics of Cardiac Myosin**  
2                   **Interacting with Regulated Thin Filaments**

3  
4 Sarah R. Clippinger Schulte<sup>1,+</sup>, Brent Scott<sup>1,+</sup>, Samantha K. Barrick<sup>1</sup>, W. Tom Stump<sup>1</sup>,  
5 Thomas Blackwell<sup>1</sup>, Michael J. Greenberg<sup>1,\*</sup>

6  
7 <sup>1</sup> Department of Biochemistry and Molecular Biophysics, Washington University School  
8 of Medicine, St. Louis, MO, 63110, USA

9  
10 \*Corresponding author:  
11 Michael J. Greenberg  
12 Department of Biochemistry and Molecular Biophysics  
13 Washington University School of Medicine  
14 660 S. Euclid Ave., Campus Box 8231  
15 St. Louis, MO 63110  
16 Phone: (314) 362-8670  
17 Email: [greenberg@wustl.edu](mailto:greenberg@wustl.edu)

18  
19 <sup>+</sup>Denotes equal contributions from S.R.C.S. and B.S.

20  
21 **Running title:** Mechanics of myosin with RTFs

22  
23 **Keywords:** optical trapping, single molecule, myosin, thin filament  
24

25 **Abstract**

26 The cardiac cycle is a tightly regulated process wherein the heart generates force to  
27 pump blood to the body during systole and then relaxes during diastole. Disruption of  
28 this finely tuned cycle can lead to a range of diseases including cardiomyopathies and  
29 heart failure. Cardiac contraction is driven by the molecular motor myosin, which pulls  
30 regulated thin filaments in a calcium-dependent manner. In some muscle and non-  
31 muscle myosins, regulatory proteins on actin tune the kinetics, mechanics, and load  
32 dependence of the myosin working stroke; however, it is not well understood whether or  
33 how thin filament regulatory proteins tune the mechanics of the cardiac myosin motor.  
34 To address this critical gap in knowledge, we used single-molecule techniques to  
35 measure the kinetics and mechanics of the substeps of the cardiac myosin working  
36 stroke in the presence and absence of thin filament regulatory proteins. We found that  
37 regulatory proteins gate the calcium-dependent interactions between myosin and the  
38 thin filament. At physiologically relevant ATP concentrations, cardiac myosin's  
39 mechanics and unloaded kinetics are not affected by thin filament regulatory proteins.  
40 We also measured the load-dependent kinetics of cardiac myosin at physiologically  
41 relevant ATP concentrations using an isometric optical clamp, and we found that thin  
42 filament regulatory proteins do not affect either the identity or magnitude of myosin's  
43 primary load-dependent transition. Interestingly, at low ATP concentrations, thin filament  
44 regulatory proteins have a small effect on actomyosin dissociation kinetics, suggesting a  
45 mechanism beyond simple steric blocking. These results have important implications for  
46 both disease modeling and computational models of muscle contraction.

47

48 **Significance Statement**

49 Human heart contraction is powered by the molecular motor  $\beta$ -cardiac myosin, which  
50 pulls on thin filaments consisting of actin and the regulatory proteins troponin and  
51 tropomyosin. In some muscle and non-muscle systems, these regulatory proteins tune  
52 the kinetics, mechanics, and load dependence of the myosin working stroke. Despite  
53 having a central role in health and disease, it is not well understood whether the  
54 mechanics or kinetics of  $\beta$ -cardiac myosin are affected by regulatory proteins. We show  
55 that regulatory proteins do not affect the mechanics or load-dependent kinetics of the  
56 working stroke at physiologically relevant ATP concentrations; however, they can affect  
57 the kinetics at low ATP concentrations, suggesting a mechanism beyond simple steric  
58 blocking. This has important implications for modeling of cardiac physiology and  
59 diseases.

60

## 61 **Introduction**

62           The human heart is finely tuned to generate the appropriate power necessary to  
63 pump blood in response to a wide range of physiological and pathological stimuli. This  
64 power output, driven by the interactions between  $\beta$ -cardiac myosin and the thin filament,  
65 has exquisite regulatory mechanisms to ensure that the heart generates sufficient  
66 power during systole to perfuse the body and then relaxes during diastolic filling (1,2).  
67 At the molecular scale, these regulatory mechanisms include the calcium-dependent  
68 gating of the interactions between myosin and the thin filament by the proteins troponin  
69 and tropomyosin (3), load-dependent effects on myosin kinetics (4,5), and thick filament  
70 dependent regulation (6). Dysfunction of these regulatory mechanisms can lead to  
71 cardiomyopathy, arrhythmias, and heart failure (7-10), and these regulatory  
72 mechanisms have emerged as therapeutic targets (11-13).

73            $\beta$ -cardiac myosin (*MYH7*) is the motor that drives cardiac contraction in human  
74 ventricles, and it has different mechanochemical properties from  $\alpha$ -cardiac myosin  
75 (*MYH6*), the motor that drives the contraction of human atrial and mouse ventricular  
76 tissues (2,14,15). Recent optical trapping experiments elucidated the mechanical and  
77 kinetic parameters that define the interactions between single  $\beta$ -cardiac myosin motors  
78 and actin (4,5,16,17). These studies demonstrated that  $\beta$ -cardiac myosin has a two  
79 substep working stroke, where the myosin generates  $\sim 6$  nm total displacement.  
80 Moreover, these studies showed that mechanical forces which oppose the  $\beta$ -cardiac  
81 myosin working stroke slow the kinetics of ADP release from actomyosin, leading to  
82 slowed crossbridge cycling kinetics. This load-dependent slowing of cycling kinetics  
83 contributes to the force-velocity relationship in muscle, which is a critical determinant of

84 power output (4). Importantly, this relationship can be impaired by mutations that cause  
85 disease, and there are compounds in clinical trials for cardiovascular diseases that  
86 target this relationship (16).

87 While previous studies have defined the mechanical and kinetic properties of  $\beta$ -  
88 cardiac myosin interacting with actin, myosin in the heart interacts with regulated thin  
89 filaments, which are macromolecular complexes consisting of actin and the regulatory  
90 proteins troponin and tropomyosin. It is currently not known whether these thin filament  
91 regulatory proteins affect the mechanics and/or kinetics of the  $\beta$ -cardiac myosin working  
92 stroke. Optical trapping experiments with other myosin isoforms demonstrated that  
93 regulatory proteins on actin can sometimes affect the mechanics and kinetics of the  
94 motor. For example, it was shown that tropomyosin Tm4.2 can increase the force  
95 sensitivity of non-muscle myosin-IIA (18). Moreover, the yeast myosin-V isoform Myo2p  
96 walks processively only in the presence of tropomyosin Tpm1p, since tropomyosin  
97 decorated actin filaments slow the rate of ADP release from the motor (19). Some  
98 studies with skeletal muscle myosin showed that thin filament regulatory proteins  
99 reduce the size of the myosin working stroke by half, potentially through disruption of  
100 the interactions between myosin's two heads (20), while other studies showed no effect  
101 (21,22).

102 Defining the fundamental parameters underlying heart contraction is critical for  
103 understanding and modeling cardiac physiology and disease. It is essential to determine  
104 how regulated thin filaments, not just actin, tune the mechanics, kinetics, and/or load-  
105 dependent properties of  $\beta$ -cardiac myosin. Therefore, we used high-resolution optical

106 trapping methods to study these properties in the presence of fully regulated thin  
107 filaments.

108

## 109 **Results**

### 110 *Reconstitution of regulated thin filaments*

111 Cardiac actin and  $\beta$ -cardiac myosin were tissue purified from porcine ventricles.  
112 Porcine cardiac actin is identical to human actin, and porcine  $\beta$ -cardiac myosin is 97%  
113 identical to human  $\beta$ -cardiac myosin, with biochemical and biophysical properties that  
114 are indistinguishable from the human isoform (4,5,14,17,23-25). Human troponin and  
115 tropomyosin were expressed recombinantly and reconstituted with purified actin to form  
116 regulated thin filaments. In vitro motility assays demonstrate that these thin filaments  
117 are functional, with no movement at low calcium (pCa 9) and robust movement at high  
118 calcium (pCa 4) (**Fig. 1a**).

119 For the optical trapping experiments, it is necessary to attach regulated thin  
120 filaments to polystyrene beads via a linkage. In these experiments, we mixed 10%  
121 biotinylated G-actin with unlabeled G-actin during polymerization and then used the  
122 biotinylated linkage to attach the reconstituted thin filament to streptavidin-coated beads  
123 (4). To ensure that the biotinylated actin does not interfere with thin filament regulation  
124 under the same fully activating or inhibiting conditions used in the trapping assays, we  
125 performed in vitro thin filament gliding assays at both low (pCa 9) and high (pCa 4)  
126 calcium (26). Calcium-based regulation of these thin filaments was observed, with  
127 movement at pCa 4 and no movement at pCa 9. There was no significant difference in  
128 the average speed of thin filament translocation at pCa 4 between regulated thin  
129 filaments made from unlabeled actin ( $0.26 \pm 0.08 \mu\text{m/s}$ ) and those including 10%  
130 biotinylated actin ( $0.25 \pm 0.08 \mu\text{m/s}$ ) ( $P = 0.12$ ) (**Fig. 1a**).

131           Next, we tested whether we could observe calcium-dependent thin filament  
132 regulation in our optical trapping assay. We used the three-bead assay pioneered by  
133 the Spudich lab (27), in which two optically trapped beads are attached to a single actin  
134 filament and then lowered onto a surface-bound bead that is sparsely coated with  
135 myosin. Using reconstituted regulated thin filaments attached to streptavidin-coated  
136 polystyrene beads, we examined binding interactions between myosin and the  
137 regulated thin filaments. At 1  $\mu$ M ATP, we could clearly resolve binding interactions  
138 between regulated thin filaments and myosin at high calcium; however, these binding  
139 interactions were exceedingly rare at low calcium (**Fig. 1b**). Taken together, our results  
140 demonstrate that we are able to reconstitute functional regulated thin filaments for  
141 optical trapping assays.

142

143 *Regulatory proteins do not affect the mechanics of the myosin working stroke at low*  
144 *ATP*

145           To examine the effects of regulatory proteins on the mechanics of the  $\beta$ -cardiac  
146 myosin working stroke, we used the three-bead optical trapping assay. Experiments  
147 were conducted at 1  $\mu$ M ATP and high calcium (pCa 4) to facilitate observation of  
148 substeps of the myosin working stroke (28). Experiments were conducted in both the  
149 presence and absence of regulatory proteins. Myosin binding to actin causes a  
150 reduction in the variance of the bead position, and individual interactions between  
151 myosin and thin filaments could clearly be resolved (**Figs. 2a-b**). Binding interactions  
152 were resolved using a covariance threshold (29). Cumulative distributions measuring  
153 the total size of the myosin working stroke show that data are well described by a single



154 Gaussian function (**Fig. 2e**;  $P = 0.09$  for unregulated and  $P = 0.25$  for regulated  
155 filaments). The total size of the  $\beta$ -cardiac myosin working stroke measured with  
156 unregulated actin ( $5.3 \pm 8.6$  nm;  $n = 364$  binding events) was consistent with previous  
157 measurements (4,17,24,29) and not significantly different from the size of the working  
158 stroke measured with regulated thin filaments ( $4.9 \pm 9.1$  nm;  $n = 491$  binding events;  $P$   
159 = 0.57).

160 Previous studies have shown that  $\beta$ -cardiac myosin accomplishes its working  
161 stroke in two substeps, with the first substep associated with phosphate release and the  
162 second associated with ADP release (4,17,25,29). To better understand the effects of  
163 regulatory proteins on the mechanics of substeps of the  $\beta$ -cardiac myosin working  
164 stroke, we used ensemble averaging of individual binding interactions, which enables  
165 the detection of subtle substeps that are typically obscured by Brownian motion  
166 (4,30,31). Binding interactions were synchronized either upon the initiation of binding  
167 (time forward averages) or the termination of binding (time reverse averages) using a  
168 changepoint algorithm and then averaged as previously described (29). The difference  
169 between the time forward and time reverse averages is indicative of a two-substep  
170 working stroke, and we see a two-substep working stroke for both the regulated and  
171 unregulated thin filaments (**Figs. 2c-d**), consistent with previous studies of unregulated  
172 thin filaments (4,25,29). The displacement of the time forward and time reverse  
173 averages at detachment gives the size of the total working stroke (29). The difference in  
174 displacement between the end of the time forward averages and the beginning of the  
175 time reverse averages gives the size of the second substep of the working stroke, and  
176 the difference between the total working stroke and the second substep gives the size

177 of the first substep. Here, we constructed cumulative distributions of substep  
178 displacements from our individual binding interactions, and the data follow the expected  
179 shape of a cumulative distribution for a single Gaussian function (**Figs. 2f-g**). We did  
180 not observe a statistically significant difference in the size of either the first ( $P = 0.36$ ) or  
181 second ( $P = 0.55$ ) substep of the working stroke in the presence or absence of  
182 regulatory proteins.

183

184 *Regulatory proteins affect kinetics of detachment at non-physiological, low ATP*  
185 *concentrations*

186       Optical trapping experiments collected at 1  $\mu\text{M}$  ATP and high calcium provide  
187 information not only on the mechanics of the working stroke but also the kinetics. The  
188 distribution of attachment durations can be used to calculate the actomyosin  
189 dissociation rate. Cumulative distributions of binding interaction durations were well  
190 fitted by single exponential functions to yield the actomyosin detachment rate (**Fig. 3a**).  
191 Interestingly, we observe that the detachment rate measured in the presence of  
192 regulatory proteins ( $3.9 (-0.3/+0.4) \text{ s}^{-1}$ ) was slightly slower than the rate measured  
193 without regulatory proteins ( $5.5 \pm 0.4 \text{ s}^{-1}$ ) ( $P = 0.002$ ). This is consistent with previous  
194 studies of skeletal muscle myosin conducted at low ATP concentrations which show  
195 slower detachment rates in the presence of regulatory proteins (20).

196       The assertion that dissociation of regulated thin filaments from myosin is slowed  
197 at low ATP is further supported by kinetic information extracted from the ensemble  
198 averages. The time reverse averages give the rate of transitioning from the second  
199 substep to the detached state, and previous studies have shown that this transition is

200 related to the biochemical rate of ATP-induced actomyosin dissociation (30,31). The  
201 rates of the time reverse ensemble averages measured here at 1  $\mu\text{M}$  ATP are well fitted  
202 by single exponential functions (**Fig. 2c-d**). The rate of this transition measured in the  
203 presence of regulatory proteins ( $4 \text{ s}^{-1}$ ) is slower than the rate measured in the absence  
204 of regulatory proteins ( $7 \text{ s}^{-1}$ ). These rates are consistent with the detachment rates  
205 measured from the cumulative distributions of attachment durations, suggesting that this  
206 transition limits the actomyosin detachment rate at low ATP (**Fig. 3a**). Consistent with  
207 the notion that this transition limits detachment, the rates of the time forward averages  
208 collected at low ATP, which report the rate of transitioning from the first substep to the  
209 second (**Figs. 2c-d**), are much faster than the rates of the time reversed averages (**Fig.**  
210 **2c-d**) or the detachment rates (**Fig. 3a**). Taken together, our trapping data strongly  
211 suggest that regulatory proteins slow the rate of ATP-induced dissociation at low ATP  
212 concentrations.

213 To further investigate the basis for the slowed detachment rate in the presence of  
214 regulatory proteins observed in the optical trap at low ATP concentrations, we  
215 measured the rates of ATP-induced actomyosin dissociation and ADP release using  
216 stopped-flow techniques (**Figs. 3b and 3c**). It has previously been shown that at low  
217 concentrations of ATP, the rate of actomyosin dissociation is limited by the rate of ATP-  
218 induced actomyosin dissociation, while at physiologically relevant ATP concentrations,  
219 detachment is limited by the rate of ADP release (14,32,33). We found that the rates of  
220 ADP release in the presence of regulatory proteins ( $76 \pm 5 \text{ s}^{-1}$ ) and in their absence ( $78$   
221  $\pm 1 \text{ s}^{-1}$ ) were not significantly different from each other ( $P = 0.45$ ), and the measured  
222 values are consistent with previous studies (4,9,10,14,34). We also measured the rate

223 of ATP-induced actomyosin dissociation. Consistent with previous studies, traces were  
224 well fitted by two exponential functions, where the rate of the fast phase (**Fig. 3c**)  
225 reports the rate of ATP-induced actomyosin dissociation, and the rate of the slow phase  
226 (**Supplemental Fig. 1**) measures the rate of a slow ATP-independent isomerization  
227 (see **Methods** for details) (35). The observed fast rate of ATP-induced dissociation was  
228 modeled as the formation of a rapid-equilibrium collision complex ( $K_1'$ ) followed by an  
229 irreversible isomerization and rapid detachment ( $k_{+2}'$ ) (see **Methods** for details). At  
230 saturating ATP, for both the regulated and unregulated thin filaments, the rates of ADP  
231 release were much slower than the rate of ATP-induced dissociation (**Fig. 3d**),  
232 consistent with ADP release limiting detachment at saturating ATP concentrations. At  
233 low ATP concentrations, the rate of ATP binding is given by the second-order ATP  
234 binding rate ( $K_1' * k_{+2}'$ ) (**Figs. 3c inset, and 3d**). Consistent with the optical trapping  
235 measurements at low ATP (**Figs. 2c, 2d and 3a**), the second order rate of ATP binding  
236 is slower for regulated filaments ( $2.2 \pm 0.4 \mu\text{M}^{-1} \text{s}^{-1}$ ) compared to unregulated filaments  
237 ( $4.0 \pm 0.8 \mu\text{M}^{-1} \text{s}^{-1}$ ,  $P = 0.04$ ). Taken together, these data demonstrate that regulatory  
238 proteins slow the rate of ATP-induced actomyosin dissociation at low ATP  
239 concentrations; however, at physiologically relevant ATP concentrations, the rate of  
240 ADP release limits dissociation, and this rate is not affected by regulatory proteins.

241

242 *Regulatory proteins do not affect the loaded kinetics of cardiac myosin at saturating*  
243 *ATP*

244 To examine the effects of load on myosin's mechanics, we used an isometric  
245 optical clamp, where one optically trapped bead is assigned to be the transducer bead

246 and the other is assigned as the motor bead (4,36). The position of the transducer bead  
247 is measured, and the motor bead is actively moved by a feedback loop to keep the  
248 transducer bead in the center of the optical trap. When myosin binds to the actin and  
249 pulls, both beads are pulled from the centers of their traps. The motor bead is then  
250 pulled to return the transducer bead back to its original position, exerting a load on the  
251 myosin (**Fig. 4a**). The attachment duration and the load on the myosin are measured.  
252 Using this technique, a range of forces can be measured. Importantly, these  
253 experiments were conducted at physiologically relevant saturating ATP concentrations  
254 (1 mM) to enable the probing of mechanical states that are populated in the healthy  
255 myocardium (4,16).

256 Using the isometric optical clamp, we obtain a scatter plot where each point  
257 represents the attachment duration and average force of a single binding interaction.  
258 The distribution of attachment durations at a given force are exponentially distributed  
259 (4,37) (**Fig. 4b**). As can be seen, the attachment duration increases gradually as force  
260 is increased, consistent with force-induced slowing of actomyosin dissociation. These  
261 data were fitted with the Bell Equation (38) using maximum likelihood estimation as  
262 previously described (4,37,39) to obtain the force-dependent detachment rate:

$$263 \quad k(F) = k_0 * e^{\frac{-F*d}{k_B*T}} \quad \text{Equation 1}$$

264 where F is the force,  $k_0$  is the rate of the primary force-sensitive transition in the  
265 absence of force, d is the distance to the transition state (i.e., the force sensitivity), and  
266  $k_B*T$  is the thermal energy, which has a value of 4.11 pN\*nm at room temperature.

267 In the absence of regulatory proteins, we found that the rate of the primary force-  
268 sensitive transition,  $k_0$ , is 28 (-5/+7)  $s^{-1}$ . This is consistent with previous measurements

269 in the optical trap (4,17,24,25,29) and the rate of the time forward ensemble average  
270 ( $35 \text{ s}^{-1}$  **Fig. 2c**). The distance to the transition state,  $d$ , is  $0.79 (-0.17/+0.19)$  nm,  
271 consistent with previous measurements (4,17,24,25,29). Consistent with previous work,  
272 these data demonstrate that for unregulated thin filaments, the detachment rate at  
273 saturating ATP is limited by the force-dependent rate of ADP release (4,17,24,25,29). In  
274 the presence of regulatory proteins (**Fig. 4b**), the rate of the primary force-sensitive  
275 transition,  $k_0$ , is  $35 (-8/+10) \text{ s}^{-1}$ , and the distance to the transition state,  $d$ , is  $0.64 (\pm 0.4)$   
276 nm. These values are not significantly different when comparing regulated and  
277 unregulated thin filaments ( $P = 0.16$  and  $P = 0.49$  for  $k_0$  and  $d$ , respectively). Taken  
278 together, we do not detect any differences in the force-dependent kinetics of cardiac  
279 myosin in the presence or absence of regulatory proteins at physiologically relevant  
280 saturating ATP concentrations.

## 281 Discussion

282 We used high-resolution optical trapping techniques to examine the mechanics  
283 and kinetics of the  $\beta$ -cardiac myosin working stroke in both the presence and absence  
284 of regulatory proteins. We found that regulatory proteins do not tune the mechanics of  
285 the working stroke or the load-dependent kinetics of  $\beta$ -cardiac myosin contraction at  
286 physiologically relevant ATP concentrations; however, we did observe slight differences  
287 in the kinetics of actomyosin dissociation in the presence of regulatory proteins at low  
288 ATP, suggesting that these regulatory proteins have subtle effects beyond just sterically  
289 blocking the interactions between myosin and the thin filament.

290

### 291 *The molecular role of regulatory proteins in cardiac muscle*

292 In the healthy heart, the ATP concentration is  $\sim 8$  mM (40,41), and even in heart  
293 failure, the ATP concentration remains in the millimolar range (1-4 mM) (42-44). Here,  
294 we found that at physiologically relevant millimolar ATP concentrations, regulatory  
295 proteins have no appreciable effect on the mechanics or kinetics of the  $\beta$ -cardiac  
296 myosin working stroke or the kinetics of actomyosin dissociation (**Fig. 4b**). Consistent  
297 with previous studies (7,9,10,45), our stopped-flow measurements show that at  
298 physiologically relevant ATP concentrations, the rate of ADP release is much slower  
299 than the rate of ATP-induced actomyosin dissociation (**Figs. 3b-c**), and therefore the  
300 muscle shortening speed will be limited by the rate of ADP release. We did not observe  
301 any differences in the rates of ADP release (**Fig. 3b**) or the rate of actomyosin  
302 dissociation measured in the optical trap at saturating ATP ( $k_0$ , **Fig. 4b**) in the presence  
303 of regulatory proteins. Although we observed subtle changes in the second-order rate of

304 ATP-induced dissociation between regulated and unregulated filaments (**Fig. 3d**), these  
305 changes are irrelevant at  $[ATP] > 50 \mu M$  where the rate of ADP release limits  
306 detachment. Therefore, in the functioning heart, regulatory proteins do not modulate the  
307 kinetics of the myosin working stroke. Moreover, our data show that the load-dependent  
308 rate of ADP release limits actomyosin dissociation, and this is unchanged by regulatory  
309 proteins (**Figs. 3b-c and 4**). Finally, we show that the mechanics of the working stroke  
310 are unchanged by regulatory proteins (**Fig. 2**). Taken together, our data are consistent  
311 with tropomyosin primarily serving a role in sterically blocking the calcium-dependent  
312 interactions between cardiac myosin and the thin filament under working conditions in  
313 the heart (46,47).

314         Although not relevant to working conditions in the heart, our results reveal that  
315 regulatory proteins modulate the kinetics of ATP-induced actomyosin dissociation at low  
316 ATP concentrations. To measure the substeps of the working stroke, we conducted  
317 optical trapping experiments at very low ATP concentrations not experienced in the cell,  
318 since this slows mechanical transitions that are too fast to resolve at physiologically  
319 relevant ATP (28). While our results show that regulatory proteins do not change the  
320 size of the working stroke or the coupling between kinetics and mechanics (**Fig. 2**), they  
321 also reveal that regulatory proteins slow the dissociation of actomyosin at very low ATP  
322 concentrations (**Fig. 3a**). The time reverse ensemble averages demonstrate that  
323 actomyosin dissociation is limited by the transition from the second substep to the  
324 detached state (**Figs. 2c-d**), which is similar to the second-order rate of ATP-induced  
325 actomyosin dissociation measured using stopped flow techniques (**Fig. 3b**) (29-31). All  
326 of these rates (actomyosin detachment rate (**Fig. 3a**), time reverse ensemble average



327 rate (**Fig. 2c-d**), and ATP-induced dissociation rate measured in the stopped flow (**Fig.**  
328 **3b**)) are similar, consistent with the rate of ATP-induced dissociation limiting  
329 detachment at low ATP. Moreover, for each of these measurements, the rates are  
330 significantly slower in the presence of regulatory proteins than in the absence (**Fig. 3d**).  
331 Taken together, these data demonstrate that at low ATP concentrations, regulatory  
332 proteins slow actomyosin detachment due to slowed ATP-induced dissociation.

333 While not relevant to physiology, the observation that regulatory proteins can  
334 tune ATP-induced dissociation has interesting implications. The tuning of detachment  
335 kinetics by regulatory proteins cannot be fully explained by a simple steric blocking  
336 mechanism, where tropomyosin only blocks the interactions between myosin and the  
337 thin filament (46). The exact mechanism of this kinetic tuning is not known; however, it  
338 has been proposed that tropomyosin can interact directly with myosin (48), and domain-  
339 specific deletion studies of tropomyosin have demonstrated that myosin can modulate  
340 tropomyosin binding to the thin filament (49,50). Moreover, recent structural studies of  
341 muscle proteins have demonstrated specific interactions between loop-4 of myosin and  
342 tropomyosin (51,52). It is possible that these interactions are allosterically coupled to  
343 changes in the nucleotide binding pocket of myosin, given the complex allosteric  
344 networks between the nucleotide binding site and the actin binding domain (53).  
345 Moreover, our results are consistent with previous optical trapping work examining  
346 skeletal muscle myosin at low ATP concentrations, which demonstrated that regulatory  
347 proteins slow the rate of actomyosin detachment (20). That being said, our data  
348 collected at saturating ATP concentrations demonstrate that kinetic tuning by regulatory  
349 proteins is likely not relevant under working conditions in cardiac muscle, and the

350 effects of regulatory proteins in cardiac muscle are well described by a steric blocking  
351 model.

352

353 *The effects of regulatory proteins on actomyosin appear to be isoform specific*

354 Here, we saw that at physiologically relevant ATP concentrations, tropomyosin  
355 and troponin do not appreciably affect the  $\beta$ -cardiac myosin working stroke.  
356 Interestingly, the effects of regulatory proteins on myosin appear to depend on the  
357 specific protein isoforms used. There are many distinct tropomyosin isoforms expressed  
358 in eukaryotic cells, with tissue-specific expression patterns, and even within the same  
359 cell, different tropomyosin isoforms localize to different subcellular actin pools (54).  
360 Moreover, while all myosin isoforms can associate with actin, they preferentially interact  
361 with certain actin structures in an isoform-specific manner (55). The biophysical role of  
362 tropomyosin appears to vary with both the myosin and tropomyosin isoform, where  
363 some tropomyosin isoforms inhibit the interactions of certain myosin isoforms with actin  
364 (55,56), while others promote these interactions (19,57). This isoform specificity has  
365 been proposed to help localize specialized motors to specific regions of the cell (58).

366 The molecular roles of tropomyosins on myosin motor function can extend  
367 beyond steric effects. For example, decoration of actin with Tpm1p slows the rate of  
368 ADP release from the myosin-V isoform Myo2p, and this slowing of ADP release  
369 kinetics enables Myo2p to processively walk on tropomyosin decorated actin filaments,  
370 something it will not do on bare actin (19). Even within the family of myosin-II motors,  
371 there is evidence that regulatory proteins could tune the load-dependent kinetics of  
372 myosin in an isoform specific manner. For example, non-muscle myosin-IIA's force

373 sensitivity is increased by tropomyosin Tm4.2 (18). In the case of skeletal muscle  
374 myosin, some studies suggested that tropomyosin decreases the step size of myosin by  
375 inhibiting the ability of both myosin heads to bind to the thin filament (20), while other  
376 studies have not seen this effect (21,22). The working stroke size that we measured for  
377  $\beta$ -cardiac myosin in the presence of regulatory proteins is indistinguishable from that  
378 measured in the absence of regulatory proteins with both one-headed and two-headed  
379 myosin constructs (4,17,24,25), so we do not believe that our inability to observe a  
380 difference in mechanics is related to the two-headed nature of the construct used here  
381 (59).

382

### 383 *Conclusions*

384 Our results clearly demonstrate that under physiologically relevant ATP  
385 concentrations, regulatory proteins do not cause appreciable changes in the mechanics  
386 or kinetics of the  $\beta$ -cardiac myosin working stroke; however, they can tune myosin's  
387 kinetics at low ATP concentrations, suggesting effects beyond a simple steric blocking  
388 mechanism. This has important implications for both our understanding of the  
389 mechanism of muscle regulation and mathematical modeling of muscle contraction,  
390 which relies on accurate, sensitive measurements of these parameters.

## 391 **Materials and Methods**

### 392 *Protein expression and purification*

393 Cardiac actin and myosin were purified from cryoground porcine ventricles as  
394 previously described (10). Human troponin and tropomyosin were expressed  
395 recombinantly in *E. coli*, purified, and complexed as described previously (10). Myosin  
396 subfragment-1 (S1) for spectroscopic measurement was prepared by limited proteolysis  
397 using chymotrypsin as previously described, and N-(1-Pyrene)iodoacetamide-labeled  
398 actin was prepared as previously described (10). Protein concentrations were  
399 determined spectroscopically. For all experiments, at least 2 separate protein  
400 preparations were used.

401

### 402 *Stopped-flow measurements of ADP release and ATP-induced actomyosin dissociation*

403 Stopped-flow experiments were performed in a SX-20 apparatus (Applied  
404 Photophysics). All experiments were conducted at 20°C in high calcium buffer (pCa 4)  
405 containing 25 mM KCl, 5 mM free MgCl<sub>2</sub>, 60 mM MOPS pH 7.0, 2 mM EGTA, 1 mM  
406 DTT, and 2.15 mM CaCl<sub>2</sub>, where the concentration of free calcium was calculated using  
407 MaxChelator (60).

408 ADP release experiments were performed as described previously (7,45,61).  
409 Briefly, 1 μM phalloidin-stabilized, pyrene-labeled actin, 1.5 μM tropomyosin (when  
410 appropriate), 1.5 μM troponin (when appropriate), 1 μM S1 myosin, and 100 μM  
411 Mg\*ADP were rapidly mixed with 5 mM Mg\*ATP. This caused an increase in  
412 fluorescence that was well fit by a single exponential function, where the rate equals the  
413 rate of ADP release (35). Each experiment consisted of 5 technically repeated

414 measurements, and the 3 experiments were used to calculate the mean and standard  
415 deviation. A two-tailed Student's t-test was used for statistical testing.

416 The rate of ATP-induced actomyosin dissociation was measured as previously  
417 described (61). Briefly, 1  $\mu\text{M}$  phalloidin-stabilized, pyrene-labeled actin, 1.5  $\mu\text{M}$   
418 tropomyosin (when appropriate), 1.5  $\mu\text{M}$  troponin (when appropriate), 1  $\mu\text{M}$  S1 myosin,  
419 and 0.04 U/mL apyrase were rapidly mixed with varying concentrations of  $\text{Mg}^*\text{ATP}$ . The  
420 resultant fluorescence transients were best fit by the sum of two exponential functions,  
421 as previously described (35). The amplitude of the fast phase was fixed to prevent  
422 artifacts due to the dead time of the instrument. As has been shown before, the rates of  
423 the fast and slow phases were hyperbolically related to the concentration of ATP. Data  
424 were interpreted according to the scheme (35):

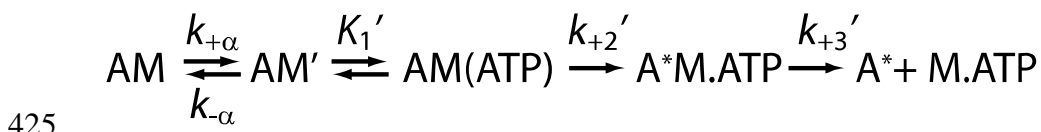

426 The fast phase of ATP-induced dissociation was modelled as the formation of a collision  
427 complex between actomyosin and ATP that is in rapid equilibrium ( $K_1'$ ) followed by an  
428 irreversible isomerization and rapid dissociation ( $k_{+2}'$ ). The rate of the fast phase,  $k_{\text{fast}}$ , is  
429 hyperbolically related to the ATP concentration by:

$$430 \quad k_{\text{fast}} = \frac{k_{+2}' \cdot [\text{ATP}]}{1/K_1' + [\text{ATP}]} \quad \text{Equation 2}$$

431 At low  $[\text{ATP}]$ , the second order rate of ATP-induced dissociation is given by  $K_1' \cdot k_{+2}'$ .  
432 The concentration of ATP was measured spectroscopically for all experiments. The rate  
433 of ATP-induced dissociation was measured over a full range of concentrations 3 times,

434 and each time, the fitted parameters were extracted. Reported values are the average  
435 of these 3 trials and the error is the standard deviation. Statistical testing was performed  
436 using a 2-tailed Student's t-test.

437

#### 438 *In vitro motility assays*

439 *In vitro* motility assays were performed as described (10). For the experiments  
440 using biotinylated actin, all experimental protocols were identical except 10% biotin-  
441 actin (Cytoskeleton) was added to 2  $\mu$ M G-actin and stabilized with  
442 tetramethylrhodamine isothiocyanate-labeled phalloidin in KMg25 buffer (60 mM MOPS  
443 pH 7.0, 25 mM KCl, 2 mM EGTA, 4 mM MgCl<sub>2</sub>, and 1 mM DTT). The concentration of  
444 free calcium was calculated using MaxChelator (60). Reported values are the average  
445 and standard deviations of the speeds from at least 3 separate days of experiments.  
446 Statistical testing was performed using a Mann-Whitney test.

447

#### 448 *Optical trapping experiments*

449 Experiments were performed on a custom-built, microscope free dual-beam  
450 optical trap described previously (29). These experiments utilized the three-bead  
451 geometry in which a thin filament is held between two optically trapped beads and  
452 lowered on to a surface bound bead that is sparsely coated with myosin (27,28).  
453 Tropomyosin was dialyzed into KMg25 buffer the night before the experiment. Actin was  
454 attached to beads using a biotin-streptavidin linkage, where actin contained 10%  
455 biotinylated actin and polystyrene beads were coated with streptavidin, as previously  
456 described (28,29). Flow cells were coated sparsely with beads as previously described

457 (28,29). Flow cells were loaded with myosin (1-7 nM in KMg25 with 200 mM KCl to  
458 prevent myosin filament formation) for 5 minutes and the surface was blocked with 1  
459 mg/mL BSA for 5 minutes. This was followed by activation buffer. For low ATP  
460 experiments, the activation buffer contained KMg25 with 1  $\mu$ M ATP, 192 U/mL glucose  
461 oxidase, 48  $\mu$ g/mL catalase, 1 mg/mL glucose, and  $\sim$ 25 pM biotin-rhodamine-phalloidin  
462 actin. For the high ATP experiments, conditions were identical, except 1 mM Mg\*ATP  
463 was used. When appropriate, troponin and tropomyosin were also included at 200 nM.  
464 The concentration of free calcium was calculated using MaxChelator (60). This was  
465 followed by 4  $\mu$ L of streptavidin beads. Flow cells were then sealed with vacuum grease  
466 as previously described and data were collected within 90 minutes of sealing (29).

467 Surface-bound beads were probed for binding interactions using small  
468 oscillations of the stage position that were stopped once data collection began. Data  
469 were collected at 20 kHz and filtered to 10 kHz according to the Nyquist criterion. For  
470 each bead-actin-bead assembly, the trap stiffness was calculated from fitting of the  
471 power spectrum as previously described (28).

472

### 473 *Implementation of the isometric optical clamp feedback*

474 Here, we used an all-digital implementation of an isometric feedback clamp (36).  
475 In an isometric optical clamp feedback experiment, the position of one bead (the  
476 transducer) is continuously sampled, and deviations from its original setpoint position  
477 are compensated for by moving the second (motor) bead using acoustic optical  
478 deflectors (AODs, Gooch and Housego). The positions of the beads were recorded  
479 using quadrant photodiodes, the feedback calculations were digitally performed on a

480 field programmable gate array (FPGA) board (National Instruments PCIe-7852), and the  
481 laser controlling the motor bead was translated using AODs.

482 The error signal used for the feedback,  $V_t$ , is the time filtered positional error for  
483 the current sample period given by:

$$V_t = K_p E_t + K_i \sum_{k=t}^{t-W} E_k$$

484 where  $K_p$  is the user defined proportional gain,  $K_i$  is the user defined integral gain,  $E_t$  is  
485 the current sample's absolute error from the setpoint, and  $W$  is the user defined  
486 integration window (up to a 255-sample memory). The compensating position for the  
487 motor bead in frequency units is then calculated by the FPGA and transmitted to the  
488 parallel port interface of the Digital Frequency Synthesizer (Analog Devices  
489 AD9912A/PCBZ) which controls the beam deflection angle from the AOD. The feedback  
490 loop can run at a maximal speed of 50 kHz, limited by parallel port cable capacitance.

491 The time constant for the feedback response time was set as previously  
492 described (36). Briefly, a bead-actin-bead dumbbell was held in the dual beam traps, a  
493 square wave was injected into the transducer bead channel, and then movement of the  
494 motor bead by the feedback system was monitored. The proportional and integral gains  
495 were empirically adjusted to give a response time of ~5 ms without introducing  
496 oscillations into the system.

497

#### 498 *Analysis of single molecule data*

499 All data from optical trapping experiments were analyzed using our custom-built  
500 MATLAB program, SPASM, as previously described (29). Briefly, binding interactions  
501 between myosin and the thin filament were identified using a peak-to-peak covariance



502 threshold, and the initiation and termination times of binding were identified using a  
503 changepoint algorithm. Data traces were excluded if the separation between the bound  
504 and unbound populations of the covariance histogram was not well defined. To improve  
505 the signal-to-noise ratio, the signal from both beads was summed and divided by 2 as  
506 previously described (29). Ensemble averages and histograms of binding interactions  
507 were generated as previously described (28-30). Ensemble averages were fit by single  
508 exponential functions in MATLAB until the signal plateaued. Cumulative distributions of  
509 step sizes and attachment durations were fit with cumulative functions for the Gaussian  
510 and exponential functions, respectively. Statistical testing for normality was done using  
511 a Shapiro-Wilk test. Statistical testing of the step sizes was done using a 2-tailed  
512 Student's t-test of individual binding interactions. 95% confidence intervals for the  
513 detachment rate were calculated by bootstrapping of individual binding interaction  
514 durations, and statistical significance was calculated according to (62).

515 In the optical trap, actomyosin remains attached until ADP is released and ATP  
516 induces actomyosin dissociation (35):

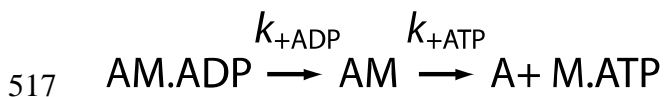

518 The attachment duration,  $t_{on}$ , is given by

$$t_{on} = \frac{1}{k_{det}} = \frac{1}{k_{+\text{ADP}}} + \frac{1}{k_{+\text{ATP}}} = \frac{1}{k_{+\text{ADP}}} + \frac{1}{k'_{+2} * [\text{ATP}]}$$

519 At low ATP, the detachment rate,  $k_{det}$ , will be dominated by the second order rate of  
520 ATP binding, while at saturating ATP, the detachment rate will be limited by the rate of  
521 ADP release.

522 For isometric optical clamp experiments, data were collected at saturating ATP

523 concentrations, where the rate of ADP release limits the rate of actomyosin dissociation  
524 (63). Binding interactions were identified using a variance threshold, set by the position  
525 of the transducer bead, and the force exerted by the motor bead and the attachment  
526 duration were measured. The relationship between the force,  $F$ , and the load dependent  
527 detachment rate,  $k(F)$  was modeled using the Bell equation (38):

$$k(F) = k_0 * \exp\left(\frac{-F * d}{k_B * T}\right)$$

528 Where  $k_0$  is the rate of the primary force sensitive transition in the absence of force,  $d$  is  
529 the distance to the transition state, and  $k_B * T$  is the thermal energy. The distribution of  
530 attachment durations is exponentially distributed at each force, and therefore follows the  
531 following probability density distribution (37):

$$k(F, t) = k(F) * \exp(-k(F) * t)$$

532 Maximum likelihood estimation (MLE) was used to determine the most likely values of  $k_0$   
533 and  $d$ , as previously described (37). 95% confidence intervals for parameter values  
534 fitting were determined using 1000 rounds of bootstrapping simulations, and hypothesis  
535 testing was performed using the difference in the means and the variances of these  
536 distributions as previously described (62).

537

### 538 *Data Availability, Reproducibility, and Software*

539 The data and code necessary to generate the figures and statistical tests in this  
540 manuscript are on Github ([https://github.com/GreenbergLab/2023-thin-filament-](https://github.com/GreenbergLab/2023-thin-filament-trapping)  
541 [trapping](https://github.com/GreenbergLab/2023-thin-filament-trapping)). Optical trapping data were analyzed with our previously published SPASM  
542 program by running the MATLAB source code from GitHub  
543 (<https://github.com/GreenbergLab/SPASM>). Similarly, the isometric force clamp data

544 was analyzed with a modified version of SPASM (in the GitHub repository). Subsequent  
545 figure generation and related analyses were performed in R (version 4.2.2) (64) running  
546 under NixOS 22.05 (Linux). The git repository hosts a “Nix Flake”, a reproducible  
547 developmental shell environment with pinned version dependencies. For NixOS users,  
548 users of the Nix package manager on macOS or the Windows Subsystem for Linux  
549 (WSL), an ephemeral shell can be spawned by running ``nix develop``  
550 `github:GreenbergLab/2023-thin-filament-trapping?dir=code`` in the terminal. Additional R  
551 packages used include the following: “readr\_2.1.3”, “readxl\_1.4.0”, “data.table\_1.14.6”,  
552 “here\_1.0.1”, “ggpubr\_0.5.0”, “ggtext\_0.1.2”, “purrr\_0.3.5”, “tidyr\_1.2.1”, “dplyr\_1.0.10”,  
553 “tibble\_3.1.8”, “cowplot\_1.1.1”, and “ggplot2\_3.4.0”.

554 **Funding Acknowledgements**

555 This work was supported by the National Institutes of Health (R01 HL141086 to M.J.G.)  
556 and the Children's Discovery Institute of Washington University and St. Louis Children's  
557 Hospital (PM-LI-2019-829 to M.J.G.).

558

559 **Conflict of interest**

560 All experiments were conducted in the absence of any financial relationships that could  
561 be construed as potential conflicts of interest.

562

563 **Author contributions**

564 S.R.C.S., W.T.S., B.S., and M.J.G. designed the experiments. S.R.C.S., B.S., and  
565 S.K.B. conducted and analyzed the optical trapping experiments. W.T.S. designed and  
566 tested the optical trapping system, including the feedback system. T.B., B.S., and  
567 M.J.G. contributed to tools for data analysis. S.R.C.S. drafted the first draft of the  
568 manuscript with M.J.G. All authors contributed to the analysis of data and writing/editing  
569 of the manuscript. M.J.G. procured funding and oversaw the project.

570

571

572 **Figure Legends**

573 **Figure 1: Reconstitution of thin filaments using biotinylated actin does not affect**  
574 **thin filament regulation. a.** In vitro motility assay boxplots showing the speed of  
575 regulated thin filament translocation with and without biotin-labeled actin at pCa 4.  
576 Individual points show the velocity of >25 thin filaments measured across 3 separate  
577 experiments. The thick middle line of the boxplot shows the median value, the  
578 top/bottom of the box are the 1<sup>st</sup> and 3<sup>rd</sup> quartiles, and the whiskers extend to 1.5 times  
579 the interquartile range. There is no difference in speed with or without biotinylated actin  
580 ( $P = 0.12$ , Mann-Whitney test). No movement was seen at pCa 9 with or without  
581 biotinylated actin. **b.** Representative optical trapping traces of regulated thin filaments  
582 containing 10% biotinylated actin conducted at low (pCa 9, orange) and high calcium  
583 (pCa 4, blue). At low calcium, binding events were very rare and at pCa 4 binding  
584 events were frequent (grey lines denote binding interactions detected by the analysis  
585 program), demonstrating regulation.

586

587 **Figure 2: Optical trapping experiments at 1  $\mu$ M ATP reveal no changes in working**  
588 **stroke mechanics with regulated thin filaments.** Data are from 364 interactions  
589 detected from 10 myosin molecules for the unregulated condition and 491 interactions  
590 from 9 myosin molecules for the regulated condition. **a-b.** Representative optical  
591 trapping data for unregulated (black) and regulated (green) thin filaments. Grey lines  
592 indicate actomyosin interactions identified by automated event detection (see **Methods**  
593 for details). **c-d.** Ensemble averages of the working stroke for myosin interacting with  
594 unregulated (left, black) and regulated (right, green) thin filaments. The rates of the

595 exponential functions fit to the time forward ( $k_f$ ) and time reverse ( $k_r$ ) averages are  
596 shown along with the magnitudes of the two substeps. **e-g**. Cumulative distributions  
597 derived from individual binding interactions for the **(e)** total displacement, **(f)** first  
598 substep, and **(g)** second substep. Each plot reports the sample mean, standard  
599 deviation, and P-values from t-tests.

600

601 **Figure 3: Regulatory proteins affect kinetics at low ATP due to slowing of ATP-**  
602 **induced dissociation. a.** Individual actomyosin attachment durations obtained in the  
603 optical trap are plotted as cumulative distributions for unregulated (black) and regulated  
604 (green) thin filaments. Distributions are fit with single exponential functions (dashed  
605 lines) to obtain the actomyosin detachment rate. Regulatory proteins significantly slow  
606 the rate of detachment (see table in **d**; value is the fitted rate, error is a bootstrapped  
607 95% confidence interval, and P-value is calculated as described in the **Methods**). **b.**  
608 Representative fluorescence transients from stopped-flow experiments measuring the  
609 rate of ADP release from actomyosin. Fits show single exponential fits to the average of  
610 5 transients. There is no difference in the rate of ADP release measured using regulated  
611 or unregulated thin filaments (see table in **d**). **c.** Fast phase of ATP-induced dissociation  
612 of myosin from regulated and unregulated thin filaments (see **Methods** for details).  
613 Each point represents the average of 5 technical repeats collected on one day. 3  
614 separate experimental days were used. Solid lines show fitting of Eq. 2. **d.** Table of  
615 parameters obtained for all kinetic measurements. The row letters indicate from which  
616 figure panel the values are derived. For the stopped-flow transient kinetics (marked “b”  
617 or “c”), the reported values are the average and standard deviations of 3 separate

618 experimental days and P-values were calculated using a Student's t-test.

619

620 **Figure 4: Regulatory proteins do not affect myosin's load-dependent kinetics at**

621 **physiological ATP. a.** Representative traces collected using the isometric optical

622 clamp. The motor bead ("M") is moved to keep the transducer bead ("T") at an isometric

623 position. During a binding interaction, the average force and the attachment duration

624 were recorded. **b.** Attachment durations as a function of force measured for unregulated

625 (black) and regulated (green) thin filaments. Each point represents a single binding

626 interaction. 393 binding interactions were observed from 10 myosin molecules for the

627 unregulated condition and 611 binding interactions were observed from 20 myosin

628 molecules for the regulated condition. Data were fitted with the Bell equation using

629 maximum likelihood estimation to obtain  $k_0$  and  $d$ . Error bars are the 95% confidence

630 intervals obtained from 1000 rounds of bootstrapping simulations. These parameters

631 were not significantly different in the presence of regulatory proteins ( $P = 0.16$  for  $k_0$  and

632  $P = 0.49$  for  $d$ ; see **Methods** for details on statistics and fitting).

633

634

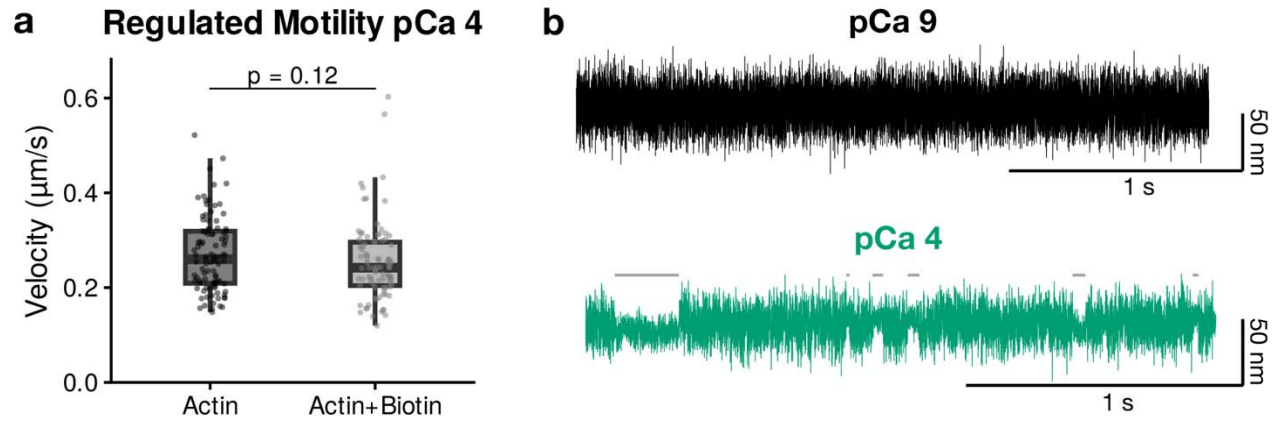

635

636 **Figure 1**

637



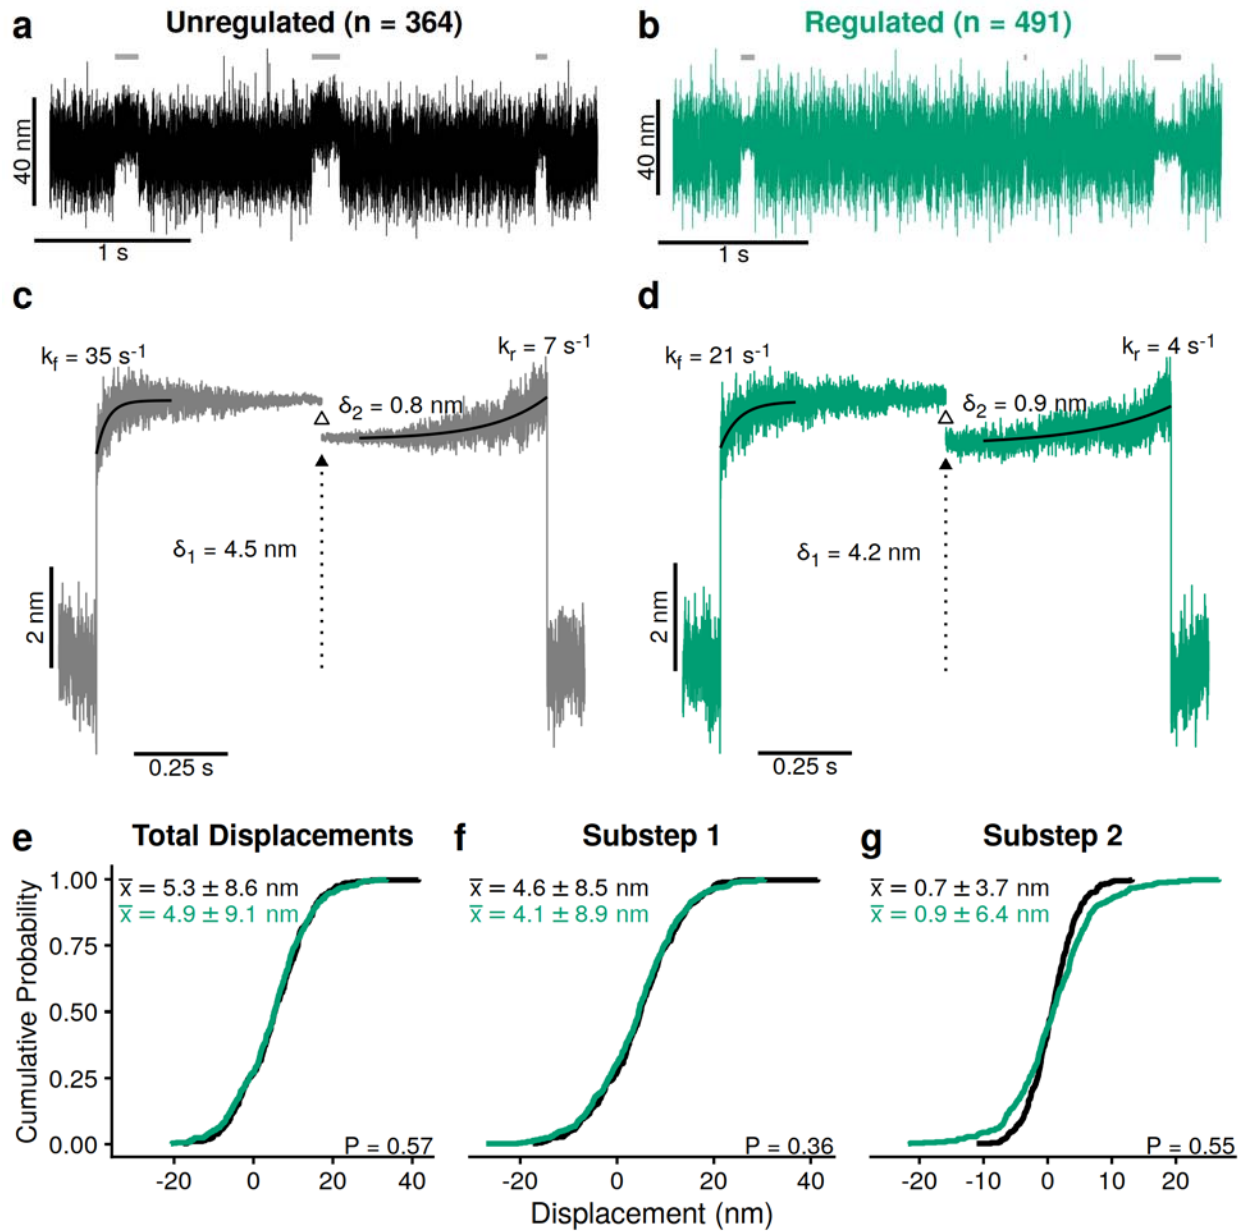

638

639

640 **Figure 2**

641

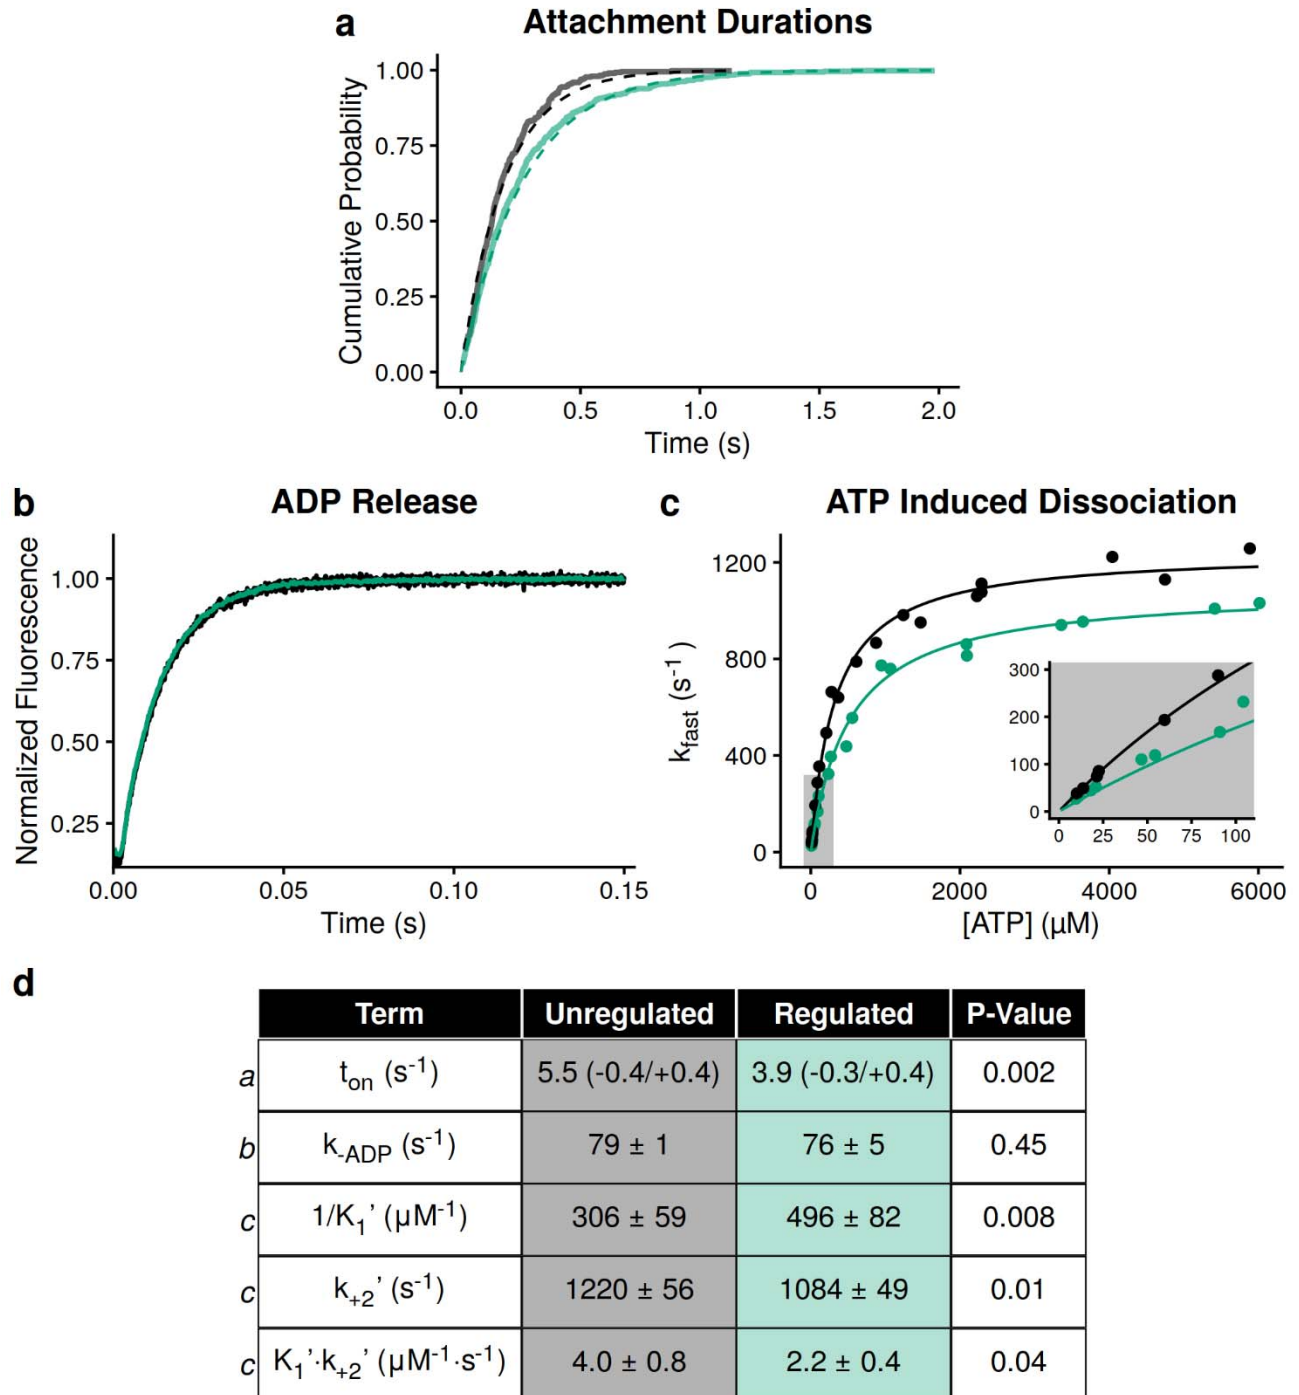

642

643 **Figure 3**

644

645

646

647

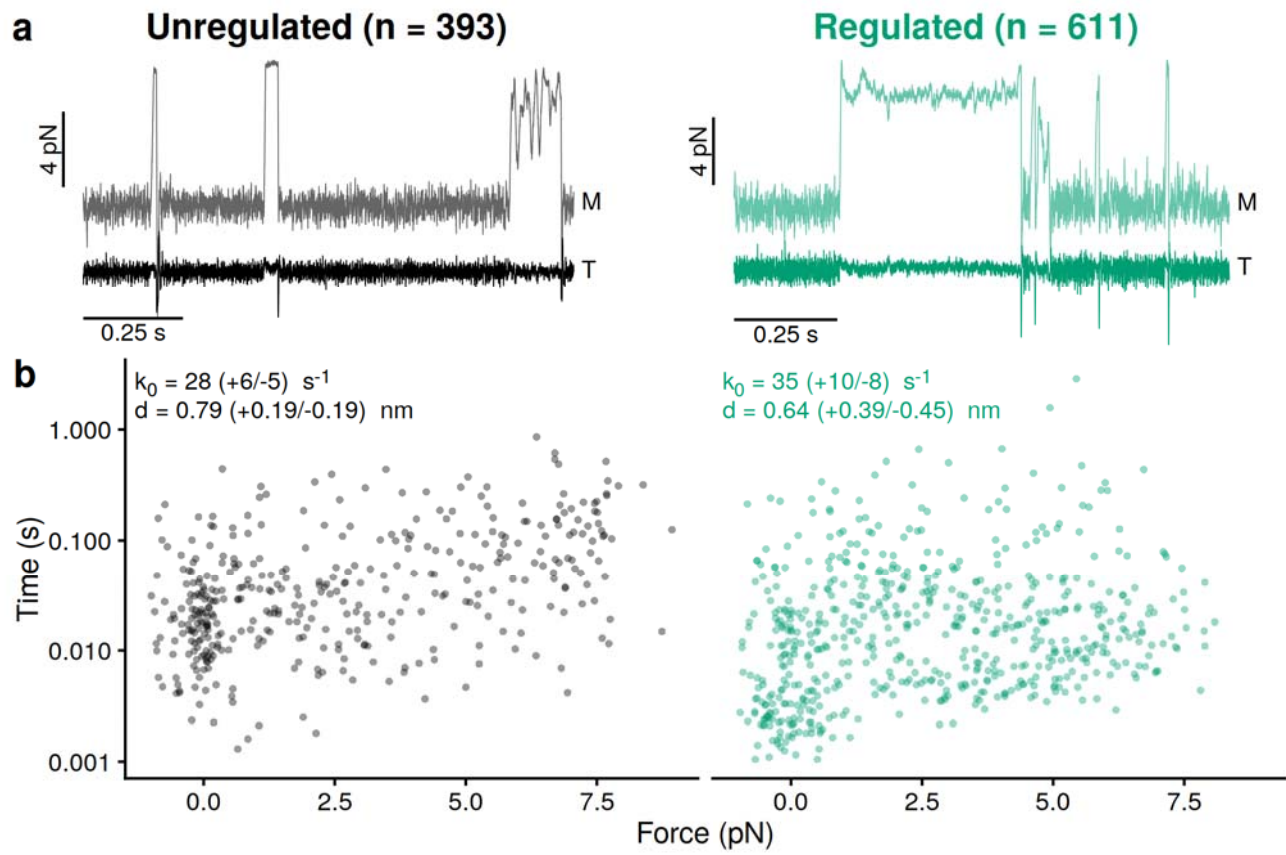

648

649 **Figure 4**

650

## 651 References

- 652 1. Greenberg, M. J., and J. C. Tardiff. 2021. Complexity in genetic cardiomyopathies and new  
653 approaches for mechanism-based precision medicine. *J Gen Physiol.* 153(3), doi:  
654 10.1085/jgp.202012662.
- 655 2. Barrick, S. K., and M. J. Greenberg. 2021. Cardiac myosin contraction and mechanotransduction  
656 in health and disease. *J Biol Chem.* 297(5):101297, doi: 10.1016/j.jbc.2021.101297.
- 657 3. McKillop, D. F., and M. A. Geeves. 1993. Regulation of the interaction between actin and myosin  
658 subfragment 1: evidence for three states of the thin filament. *Biophys J.* 65(2):693-701, doi:  
659 10.1016/S0006-3495(93)81110-X.
- 660 4. Greenberg, M. J., H. Shuman, and E. M. Ostap. 2014. Inherent force-dependent properties of  
661 beta-cardiac myosin contribute to the force-velocity relationship of cardiac muscle. *Biophys J.*  
662 107(12):L41-L44, doi: 10.1016/j.bpj.2014.11.005.
- 663 5. Sung, J., S. Nag, K. I. Mortensen, C. L. Vestergaard, S. Sutton, K. Ruppel, H. Flyvbjerg, and J. A.  
664 Spudich. 2015. Harmonic force spectroscopy measures load-dependent kinetics of individual  
665 human beta-cardiac myosin molecules. *Nat Commun.* 6:7931, doi: 10.1038/ncomms8931.
- 666 6. Anderson, R. L., D. V. Trivedi, S. S. Sarkar, M. Henze, W. Ma, H. Gong, C. S. Rogers, J. M. Gorham,  
667 F. L. Wong, M. M. Morck, J. G. Seidman, K. M. Ruppel, T. C. Irving, R. Cooke, E. M. Green, and J.  
668 A. Spudich. 2018. Deciphering the super relaxed state of human beta-cardiac myosin and the  
669 mode of action of mavacamten from myosin molecules to muscle fibers. *Proc Natl Acad Sci U S*  
670 *A.* 115(35):E8143-E8152, doi: 10.1073/pnas.1809540115.
- 671 7. Barrick, S. K., L. Greenberg, and M. J. Greenberg. 2021. A troponin T variant linked with pediatric  
672 dilated cardiomyopathy reduces the coupling of thin filament activation to myosin and calcium  
673 binding. *Mol Biol Cell.* 32(18):1677-1689, doi: 10.1091/mbc.E21-02-0082.
- 674 8. Ezekian, J. E., S. R. Clippinger, J. M. Garcia, Q. Yang, S. Denfield, A. Jeewa, W. J. Dreyer, W. Zou,  
675 Y. Fan, H. D. Allen, J. J. Kim, M. J. Greenberg, and A. P. Landstrom. 2020. Variant R94C in TNNT2-  
676 Encoded Troponin T Predisposes to Pediatric Restrictive Cardiomyopathy and Sudden Death  
677 Through Impaired Thin Filament Relaxation Resulting in Myocardial Diastolic Dysfunction. *J Am*  
678 *Heart Assoc.* 9(5):e015111, doi: 10.1161/JAHA.119.015111.
- 679 9. Clippinger, S. R., P. E. Cloonan, W. Wang, L. Greenberg, W. T. Stump, P. Angsutrarux, J. M.  
680 Nerbonne, and M. J. Greenberg. 2020. Mechanical dysfunction induced by a hypertrophic  
681 cardiomyopathy mutation is the primary driver of cellular adaptation.  
682 *bioRxiv.*2020.2005.2004.067181, doi: 10.1101/2020.05.04.067181.
- 683 10. Clippinger, S. R., P. E. Cloonan, L. Greenberg, M. Ernst, W. T. Stump, and M. J. Greenberg. 2019.  
684 Disrupted mechanobiology links the molecular and cellular phenotypes in familial dilated  
685 cardiomyopathy. *Proc Natl Acad Sci U S A.* 116(36):17831-17840, doi:  
686 10.1073/pnas.1910962116.
- 687 11. He, H., T. Baka, J. Balschi, A. S. Motani, K. K. Nguyen, Q. Liu, R. Slater, B. Rock, C. Wang, C. Hale,  
688 G. Karamanlidis, J. J. Hartman, F. I. Malik, J. D. Reagan, and I. Luptak. 2022. Novel Small-  
689 Molecule Troponin Activator Increases Cardiac Contractile Function Without Negative Impact on  
690 Energetics. *Circ Heart Fail.* 15(3):e009195, doi: 10.1161/CIRCHEARTFAILURE.121.009195.
- 691 12. Malik, F. I., J. J. Hartman, K. A. Elias, B. P. Morgan, H. Rodriguez, K. Brejc, R. L. Anderson, S. H.  
692 Sueoka, K. H. Lee, J. T. Finer, R. Sakowicz, R. Baliga, D. R. Cox, M. Garard, G. Godinez, R. Kawas, E.  
693 Kraynack, D. Lenzi, P. P. Lu, A. Muci, C. Niu, X. Qian, D. W. Pierce, M. Pokrovskii, I. Suehiro, S.  
694 Sylvester, T. Tochimoto, C. Valdez, W. Wang, T. Katori, D. A. Kass, Y. T. Shen, S. F. Vatner, and D.  
695 J. Morgans. 2011. Cardiac myosin activation: a potential therapeutic approach for systolic heart  
696 failure. *Science.* 331(6023):1439-1443, doi: 10.1126/science.1200113.

- 697 13. Green, E. M., H. Wakimoto, R. L. Anderson, M. J. Evanchik, J. M. Gorham, B. C. Harrison, M.  
698 Henze, R. Kawas, J. D. Oslob, H. M. Rodriguez, Y. Song, W. Wan, L. A. Leinwand, J. A. Spudich, R.  
699 S. McDowell, J. G. Seidman, and C. E. Seidman. 2016. A small-molecule inhibitor of sarcomere  
700 contractility suppresses hypertrophic cardiomyopathy in mice. *Science*. 351(6273):617-621, doi:  
701 10.1126/science.aad3456.
- 702 14. Deacon, J. C., M. J. Bloemink, H. Rezavandi, M. A. Geeves, and L. A. Leinwand. 2012.  
703 Identification of functional differences between recombinant human alpha and beta cardiac  
704 myosin motors. *Cell Mol Life Sci*. 69(13):2261-2277, doi: 10.1007/s00018-012-0927-3.
- 705 15. Palmiter, K. A., M. J. Tyska, D. E. Dupuis, N. R. Alpert, and D. M. Warshaw. 1999. Kinetic  
706 differences at the single molecule level account for the functional diversity of rabbit cardiac  
707 myosin isoforms. *J Physiol*. 519 Pt 3:669-678, doi: 10.1111/j.1469-7793.1999.0669n.x.
- 708 16. Liu, C., M. Kawana, D. Song, K. M. Ruppel, and J. A. Spudich. 2018. Controlling load-dependent  
709 kinetics of beta-cardiac myosin at the single-molecule level. *Nat Struct Mol Biol*. 25(6):505-514,  
710 doi: 10.1038/s41594-018-0069-x.
- 711 17. Woody, M. S., M. J. Greenberg, B. Barua, D. A. Winkelmann, Y. E. Goldman, and E. M. Ostap.  
712 2018. Positive cardiac inotrope omecamtiv mecarbil activates muscle despite suppressing the  
713 myosin working stroke. *Nat Commun*. 9(1):3838, doi: 10.1038/s41467-018-06193-2.
- 714 18. Hundt, N., W. Steffen, S. Pathan-Chhatbar, M. H. Taft, and D. J. Manstein. 2016. Load-dependent  
715 modulation of non-muscle myosin-2A function by tropomyosin 4.2. *Sci Rep*. 6:20554, doi:  
716 10.1038/srep20554.
- 717 19. Hodges, A. R., E. B. Kremetsova, C. S. Bookwalter, P. M. Fagnant, T. E. Sladewski, and K. M.  
718 Trybus. 2012. Tropomyosin is essential for processive movement of a class V myosin from  
719 budding yeast. *Curr Biol*. 22(15):1410-1416, doi: 10.1016/j.cub.2012.05.035.
- 720 20. Kad, N. M., S. Kim, D. M. Warshaw, P. VanBuren, and J. E. Baker. 2005. Single-myosin crossbridge  
721 interactions with actin filaments regulated by troponin-tropomyosin. *Proc Natl Acad Sci U S A*.  
722 102(47):16990-16995, doi: 10.1073/pnas.0506326102.
- 723 21. Longyear, T., S. Walcott, and E. P. Debold. 2017. The molecular basis of thin filament activation:  
724 from single molecule to muscle. *Sci Rep*. 7(1):1822, doi: 10.1038/s41598-017-01604-8.
- 725 22. Unger, M., and E. P. Debold. 2019. Acidosis decreases the Ca(2+) sensitivity of thin filaments by  
726 preventing the first actomyosin interaction. *Am J Physiol Cell Physiol*. 317(4):C714-C718, doi:  
727 10.1152/ajpcell.00196.2019.
- 728 23. Nag, S., R. F. Sommese, Z. Ujfalusi, A. Combs, S. Langer, S. Sutton, L. A. Leinwand, M. A. Geeves,  
729 K. M. Ruppel, and J. A. Spudich. 2015. Contractility parameters of human beta-cardiac myosin  
730 with the hypertrophic cardiomyopathy mutation R403Q show loss of motor function. *Sci Adv*.  
731 1(9):e1500511, doi: 10.1126/sciadv.1500511.
- 732 24. Woody, M. S., D. A. Winkelmann, M. Capitanio, E. M. Ostap, and Y. E. Goldman. 2019. Single  
733 molecule mechanics resolves the earliest events in force generation by cardiac myosin. *Elife*. 8,  
734 doi: 10.7554/eLife.49266.
- 735 25. Snoberger, A., B. Barua, J. L. Atherton, H. Shuman, E. Forgacs, Y. E. Goldman, D. A. Winkelmann,  
736 and E. M. Ostap. 2021. Myosin with hypertrophic cardiac mutation R712L has a decreased  
737 working stroke which is rescued by omecamtiv mecarbil. *eLife*. 10, doi: 10.7554/eLife.63691.
- 738 26. Kron, S. J., and J. A. Spudich. 1986. Fluorescent actin filaments move on myosin fixed to a glass  
739 surface. *Proc Natl Acad Sci U S A*. 83(17):6272-6276, doi: 10.1073/pnas.83.17.6272.
- 740 27. Finer, J. T., R. M. Simmons, and J. A. Spudich. 1994. Single myosin molecule mechanics:  
741 piconewton forces and nanometre steps. *Nature*. 368(6467):113-119, doi: 10.1038/368113a0.
- 742 28. Greenberg, M. J., H. Shuman, and E. M. Ostap. 2017. Measuring the Kinetic and Mechanical  
743 Properties of Non-processive Myosins Using Optical Tweezers. *Methods Mol Biol*. 1486:483-509,  
744 doi: 10.1007/978-1-4939-6421-5\_19.

- 745 29. Blackwell, T., W. T. Stump, S. R. Clippinger, and M. J. Greenberg. 2021. Computational Tool for  
746 Ensemble Averaging of Single-Molecule Data. *Biophys J.* 120(1):10-20, doi:  
747 10.1016/j.bpj.2020.10.047.
- 748 30. Veigel, C., L. M. Coluccio, J. D. Jontes, J. C. Sparrow, R. A. Milligan, and J. E. Molloy. 1999. The  
749 motor protein myosin-I produces its working stroke in two steps. *Nature.* 398(6727):530-533,  
750 doi: 10.1038/19104.
- 751 31. Chen, C., M. J. Greenberg, J. M. Laakso, E. M. Ostap, Y. E. Goldman, and H. Shuman. 2012.  
752 Kinetic schemes for post-synchronized single molecule dynamics. *Biophys J.* 102(6):L23-25, doi:  
753 10.1016/j.bpj.2012.01.054.
- 754 32. Barany, M. 1967. ATPase activity of myosin correlated with speed of muscle shortening. *J Gen*  
755 *Physiol.* 50(6):Suppl:197-218, doi: 10.1085/jgp.50.6.197.
- 756 33. Siemankowski, R. F., M. O. Wiseman, and H. D. White. 1985. ADP dissociation from actomyosin  
757 subfragment 1 is sufficiently slow to limit the unloaded shortening velocity in vertebrate muscle.  
758 *Proc Natl Acad Sci U S A.* 82(3):658-662, doi: 10.1073/pnas.82.3.658.
- 759 34. Papadaki, M., T. Kampaengsri, S. K. Barrick, S. G. Campbell, D. von Lewinski, P. P. Rainer, S. P.  
760 Harris, M. J. Greenberg, and J. A. Kirk. 2022. Myofilament glycation in diabetes reduces  
761 contractility by inhibiting tropomyosin movement, is rescued by cMyBPC domains. *J Mol Cell*  
762 *Cardiol.* 162:1-9, doi: 10.1016/j.yjmcc.2021.08.012.
- 763 35. De La Cruz, E. M., and E. M. Ostap. 2009. Kinetic and equilibrium analysis of the myosin ATPase.  
764 *Methods Enzymol.* 455:157-192, doi: 10.1016/S0076-6879(08)04206-7.
- 765 36. Takagi, Y., E. E. Homsher, Y. E. Goldman, and H. Shuman. 2006. Force generation in single  
766 conventional actomyosin complexes under high dynamic load. *Biophys J.* 90(4):1295-1307, doi:  
767 10.1529/biophysj.105.068429.
- 768 37. Woody, M. S., J. H. Lewis, M. J. Greenberg, Y. E. Goldman, and E. M. Ostap. 2016. MEMLET: An  
769 Easy-to-Use Tool for Data Fitting and Model Comparison Using Maximum-Likelihood Estimation.  
770 *Biophys J.* 111(2):273-282, doi: 10.1016/j.bpj.2016.06.019.
- 771 38. Bell, G. I. 1978. Models for the specific adhesion of cells to cells. *Science.* 200(4342):618-627,  
772 doi: 10.1126/science.347575.
- 773 39. Laakso, J. M., J. H. Lewis, H. Shuman, and E. M. Ostap. 2008. Myosin I can act as a molecular  
774 force sensor. *Science.* 321(5885):133-136, doi: 10.1126/science.1159419.
- 775 40. Stewart, L. C., R. Deslauriers, and V. V. Kupriyanov. 1994. Relationships between cytosolic [ATP],  
776 [ATP]/[ADP] and ionic fluxes in the perfused rat heart: A <sup>31</sup>P, <sup>23</sup>Na and <sup>87</sup>Rb NMR study. *J Mol*  
777 *Cell Cardiol.* 26(10):1377-1392, doi: 10.1006/jmcc.1994.1156.
- 778 41. Wu, F., J. Zhang, and D. A. Beard. 2009. Experimentally observed phenomena on cardiac  
779 energetics in heart failure emerge from simulations of cardiac metabolism. *Proc Natl Acad Sci U*  
780 *S A.* 106(17):7143-7148, doi: 10.1073/pnas.0812768106.
- 781 42. Beer, M., T. Seyfarth, J. Sandstede, W. Landschutz, C. Lipke, H. Kostler, M. von Kienlin, K. Harre,  
782 D. Hahn, and S. Neubauer. 2002. Absolute concentrations of high-energy phosphate metabolites  
783 in normal, hypertrophied, and failing human myocardium measured noninvasively with (<sup>31</sup>P)-  
784 SLOOP magnetic resonance spectroscopy. *J Am Coll Cardiol.* 40(7):1267-1274, doi:  
785 10.1016/s0735-1097(02)02160-5.
- 786 43. Starling, R. C., D. F. Hammer, and R. A. Altschuld. 1998. Human myocardial ATP content and in  
787 vivo contractile function. *Mol Cell Biochem.* 180(1-2):171-177.
- 788 44. Yabe, T., K. Mitsunami, T. Inubushi, and M. Kinoshita. 1995. Quantitative measurements of  
789 cardiac phosphorus metabolites in coronary artery disease by <sup>31</sup>P magnetic resonance  
790 spectroscopy. *Circulation.* 92(1):15-23, doi: 10.1161/01.cir.92.1.15.
- 791 45. Papadaki, M., T. Kampaengsri, S. K. Barrick, S. G. Campbell, D. von Lewinski, P. P. Rainer, S. P.  
792 Harris, M. J. Greenberg, and J. A. Kirk. 2021. Myofilament glycation in diabetes reduces

- 793 contractility by inhibiting tropomyosin movement, is rescued by cMyBPC domains. *Journal of*  
794 *molecular and cellular cardiology*. 162:1-9, doi: 10.1016/j.yjmcc.2021.08.012.
- 795 46. Vibert, P., R. Craig, and W. Lehman. 1997. Steric-model for activation of muscle thin filaments. *J*  
796 *Mol Biol*. 266(1):8-14, doi: 10.1006/jmbi.1996.0800.
- 797 47. Lehman, W., R. Craig, and P. Vibert. 1994. Ca(2+)-induced tropomyosin movement in *Limulus*  
798 thin filaments revealed by three-dimensional reconstruction. *Nature*. 368(6466):65-67, doi:  
799 10.1038/368065a0.
- 800 48. Lehrer, S. S. 1994. The regulatory switch of the muscle thin filament: Ca<sup>2+</sup> or myosin heads? *J*  
801 *Muscle Res Cell Motil*. 15(3):232-236, doi: 10.1007/BF00123476.
- 802 49. Hitchcock-DeGregori, S. E., Y. Song, and J. Moraczewska. 2001. Importance of internal regions  
803 and the overall length of tropomyosin for actin binding and regulatory function. *Biochemistry*.  
804 40(7):2104-2112, doi: 10.1021/bi002421z.
- 805 50. Landis, C., N. Back, E. Homsher, and L. S. Tobacman. 1999. Effects of tropomyosin internal  
806 deletions on thin filament function. *J Biol Chem*. 274(44):31279-31285, doi:  
807 10.1074/jbc.274.44.31279.
- 808 51. Doran, M. H., M. J. Rynkiewicz, E. Pavadai, S. M. L. Bodt, D. Rasicci, J. R. Moore, C. M. Yengo, E.  
809 Bullitt, and W. Lehman. 2023. Myosin loop-4 is critical for optimal tropomyosin repositioning on  
810 actin during muscle activation and relaxation. *J Gen Physiol*. 155(2), doi:  
811 10.1085/jgp.202213274.
- 812 52. Doran, M. H., E. Pavadai, M. J. Rynkiewicz, J. Walklate, E. Bullitt, J. R. Moore, M. Regnier, M. A.  
813 Geeves, and W. Lehman. 2020. Cryo-EM and Molecular Docking Shows Myosin Loop 4 Contacts  
814 Actin and Tropomyosin on Thin Filaments. *Biophys J*. 119(4):821-830, doi:  
815 10.1016/j.bpj.2020.07.006.
- 816 53. Porter, J. R., A. Meller, M. I. Zimmerman, M. J. Greenberg, and G. R. Bowman. 2020.  
817 Conformational distributions of isolated myosin motor domains encode their mechanochemical  
818 properties. *Elife*. 9, doi: 10.7554/eLife.55132.
- 819 54. Gunning, P. W., E. C. Hardeman, P. Lappalainen, and D. P. Mulvihill. 2015. Tropomyosin - master  
820 regulator of actin filament function in the cytoskeleton. *Journal of cell science*. 128(16):2965-  
821 2974, doi: 10.1242/jcs.172502.
- 822 55. Ostap, E. M. 2008. Tropomyosins as discriminators of myosin function. *Adv Exp Med Biol*.  
823 644:273-282, doi: 10.1007/978-0-387-85766-4\_20.
- 824 56. Kee, A. J., L. Yang, C. A. Lucas, M. J. Greenberg, N. Martel, G. M. Leong, W. E. Hughes, G. J.  
825 Cooney, D. E. James, E. M. Ostap, W. Han, P. W. Gunning, and E. C. Hardeman. 2015. An actin  
826 filament population defined by the tropomyosin Tpm3.1 regulates glucose uptake. *Traffic*.  
827 16(7):691-711, doi: 10.1111/tra.12282.
- 828 57. Pelham, R. J., Jr., J. J. Lin, and Y. L. Wang. 1996. A high molecular mass non-muscle tropomyosin  
829 isoform stimulates retrograde organelle transport. *J Cell Sci*. 109 ( Pt 5):981-989, doi:  
830 10.1242/jcs.109.5.981.
- 831 58. Lord, M. 2011. Cytoskeletal regulation: sorting out stress fibers with tropomyosin. *Curr Biol*.  
832 21(7):R255-257, doi: 10.1016/j.cub.2011.02.043.
- 833 59. Tyska, M. J., D. E. Dupuis, W. H. Guilford, J. B. Patlak, G. S. Waller, K. M. Trybus, D. M. Warshaw,  
834 and S. Lowey. 1999. Two heads of myosin are better than one for generating force and motion.  
835 *Proc Natl Acad Sci U S A*. 96(8):4402-4407, doi: 10.1073/pnas.96.8.4402.
- 836 60. Bers, D. M., C. W. Patton, and R. Nuccitelli. 2010. A practical guide to the preparation of Ca(2+)  
837 buffers. *Methods Cell Biol*. 99:1-26, doi: 10.1016/B978-0-12-374841-6.00001-3.
- 838 61. Greenberg, M. J., T. Lin, Y. E. Goldman, H. Shuman, and E. M. Ostap. 2012. Myosin IC generates  
839 power over a range of loads via a new tension-sensing mechanism. *Proc Natl Acad Sci U S A*.  
840 109(37):E2433-2440, doi: 10.1073/pnas.1207811109.

- 841 62. Barrick, S. K., S. R. Clippinger, L. Greenberg, and M. J. Greenberg. 2019. Computational Tool to  
842 Study Perturbations in Muscle Regulation and Its Application to Heart Disease. *Biophys J.*  
843 116(12):2246-2252, doi: 10.1016/j.bpj.2019.05.002.
- 844 63. Nyitrai, M., and M. A. Geeves. 2004. Adenosine diphosphate and strain sensitivity in myosin  
845 motors. *Philos Trans R Soc Lond B Biol Sci.* 359(1452):1867-1877, doi: 10.1098/rstb.2004.1560.
- 846 64. R Core Team. 2021. R: A Language and Environment for Statistical Computing. *R Foundation for*  
847 *Statistical Computing.*
- 848
